# Supplementary material for: Microfluidic Platforms Designed for Morphological and Photosynthetic Investigations of Chlamydomonas reinhardtii on a Single-Cell Level
Source: MDPI journal article supplement (doi:10.3390/cells11020285), 2022-01-14
Supplement: s1 [file s1]

A

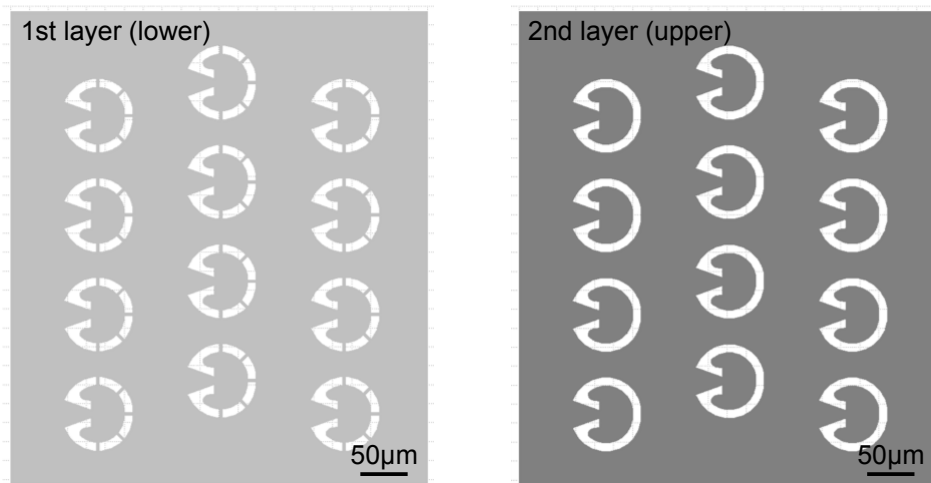

B

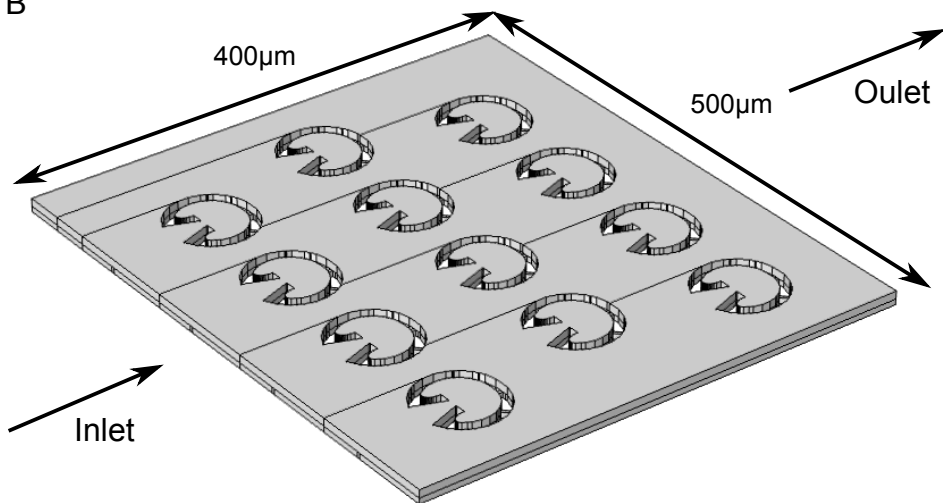

**Supplementary Figure S2.** Schematic representation of the 3D computational model in case of the two-layered “Pot-shaped” microfluidic device. A) Scheme of the two layers in case of Type VI. Pot-shaped device. B) The applied geometry in the Comsol simulations showing the layered structure and the direction of the fluid flow.
