# Supplementary material for: Microfluidic Platforms Designed for Morphological and Photosynthetic Investigations of Chlamydomonas reinhardtii on a Single-Cell Level
Source: MDPI journal article supplement (doi:10.3390/cells11020285), 2022-01-14
Supplement: s1 [file s1]

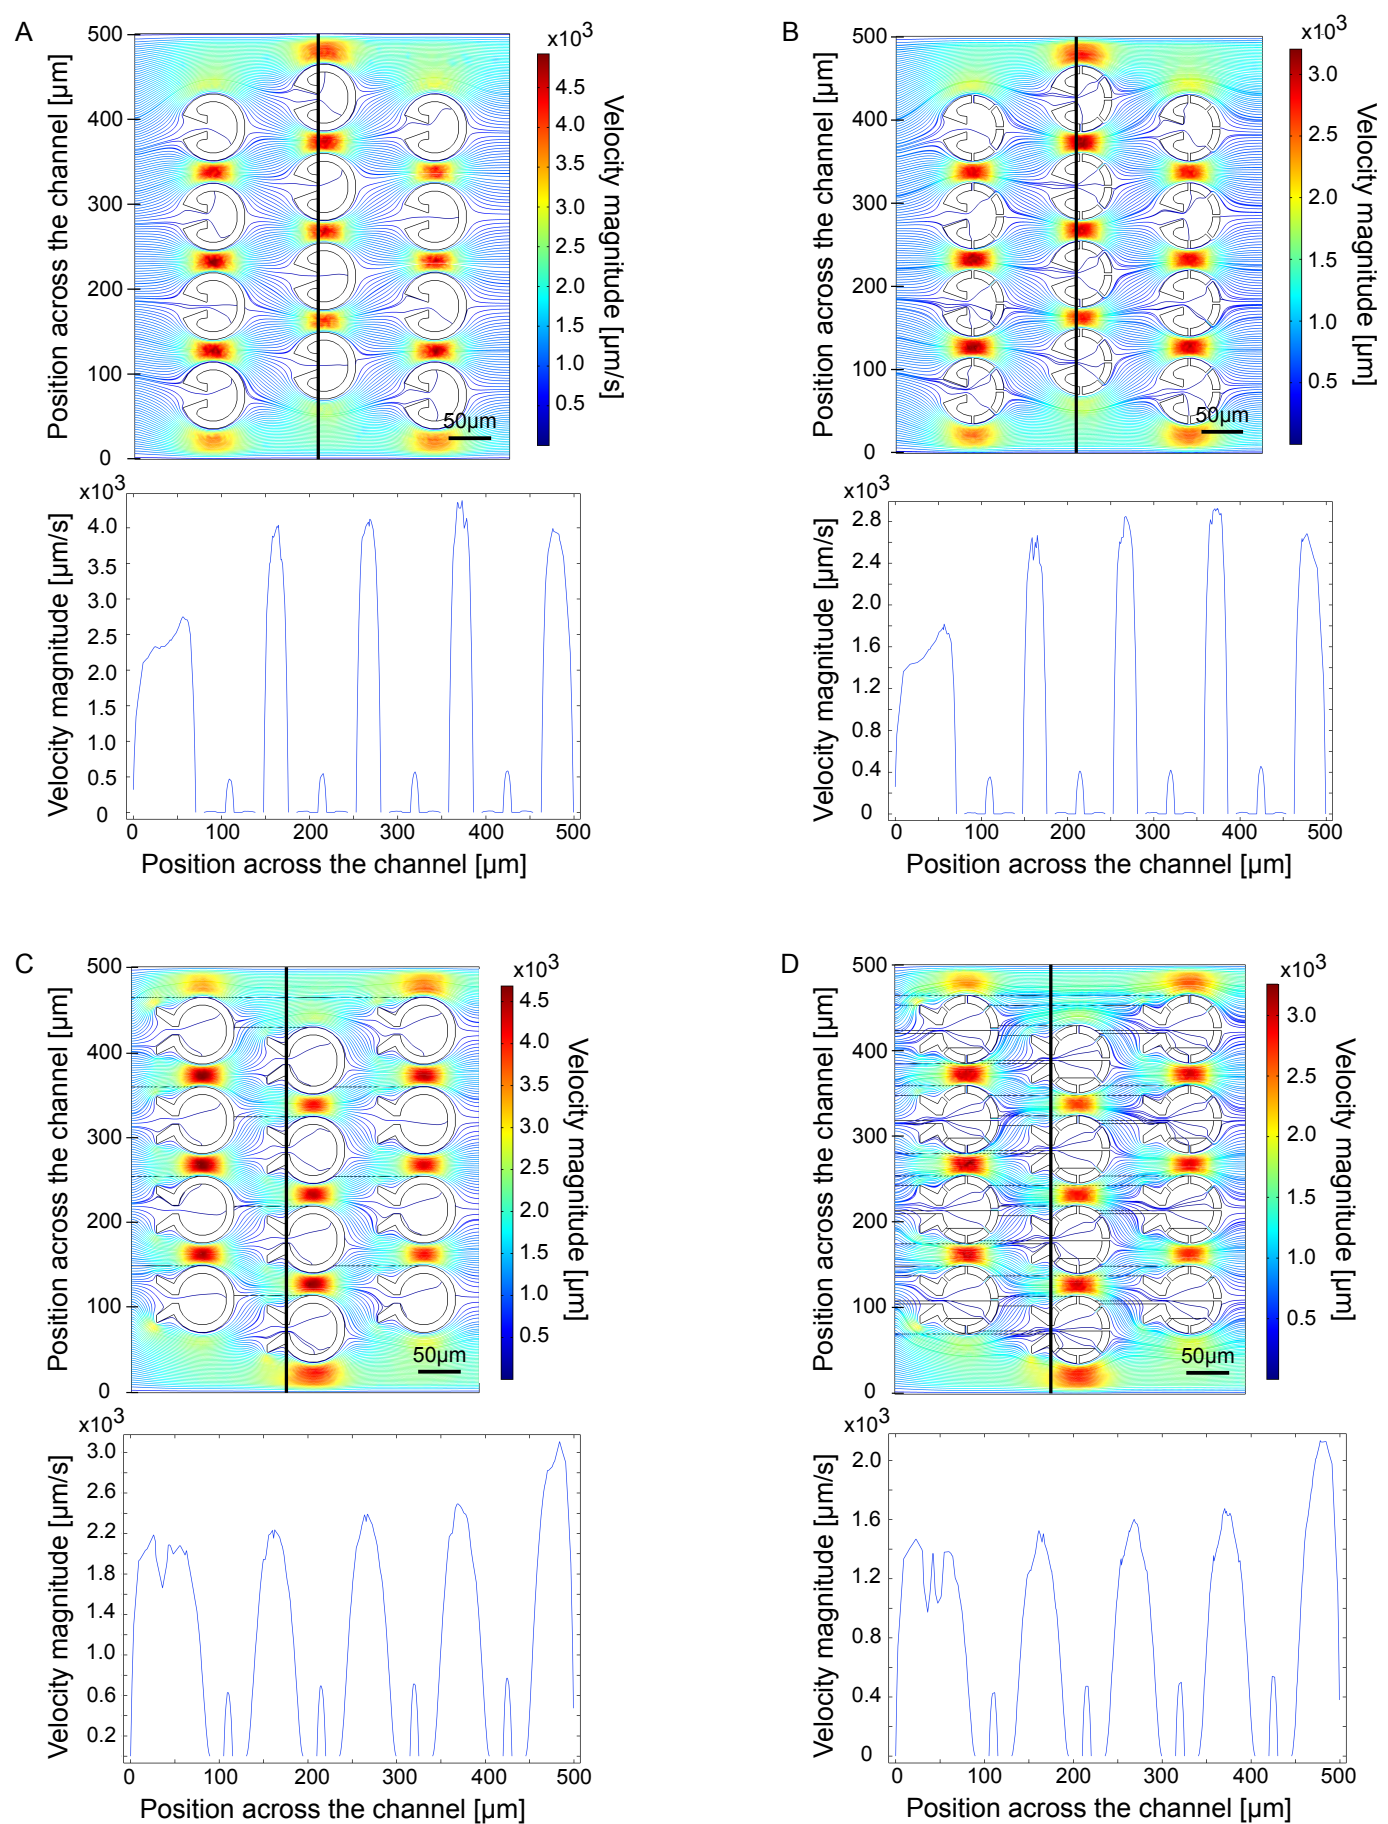

**Supplementary Figure S3.** Computational modelling of the fluid flow in the “Pot” microfluidic device. The density of the streamlines and the color code represents the velocity magnitude. A-B) flow lines at 7.6 and 1.9  $\mu\text{m}$  depth in case of Type VI traps and the corresponding velocity magnitude profile across the channel along the line; C-D) flow lines at 7.6 and 1.9  $\mu\text{m}$  depth in case of Type II traps and the corresponding velocity magnitude profile across the channel along the line;
