# Supplementary material for: Microfluidic Platforms Designed for Morphological and Photosynthetic Investigations of Chlamydomonas reinhardtii on a Single-Cell Level
Source: MDPI journal article supplement (doi:10.3390/cells11020285), 2022-01-14
Supplement: s1 [file s1]

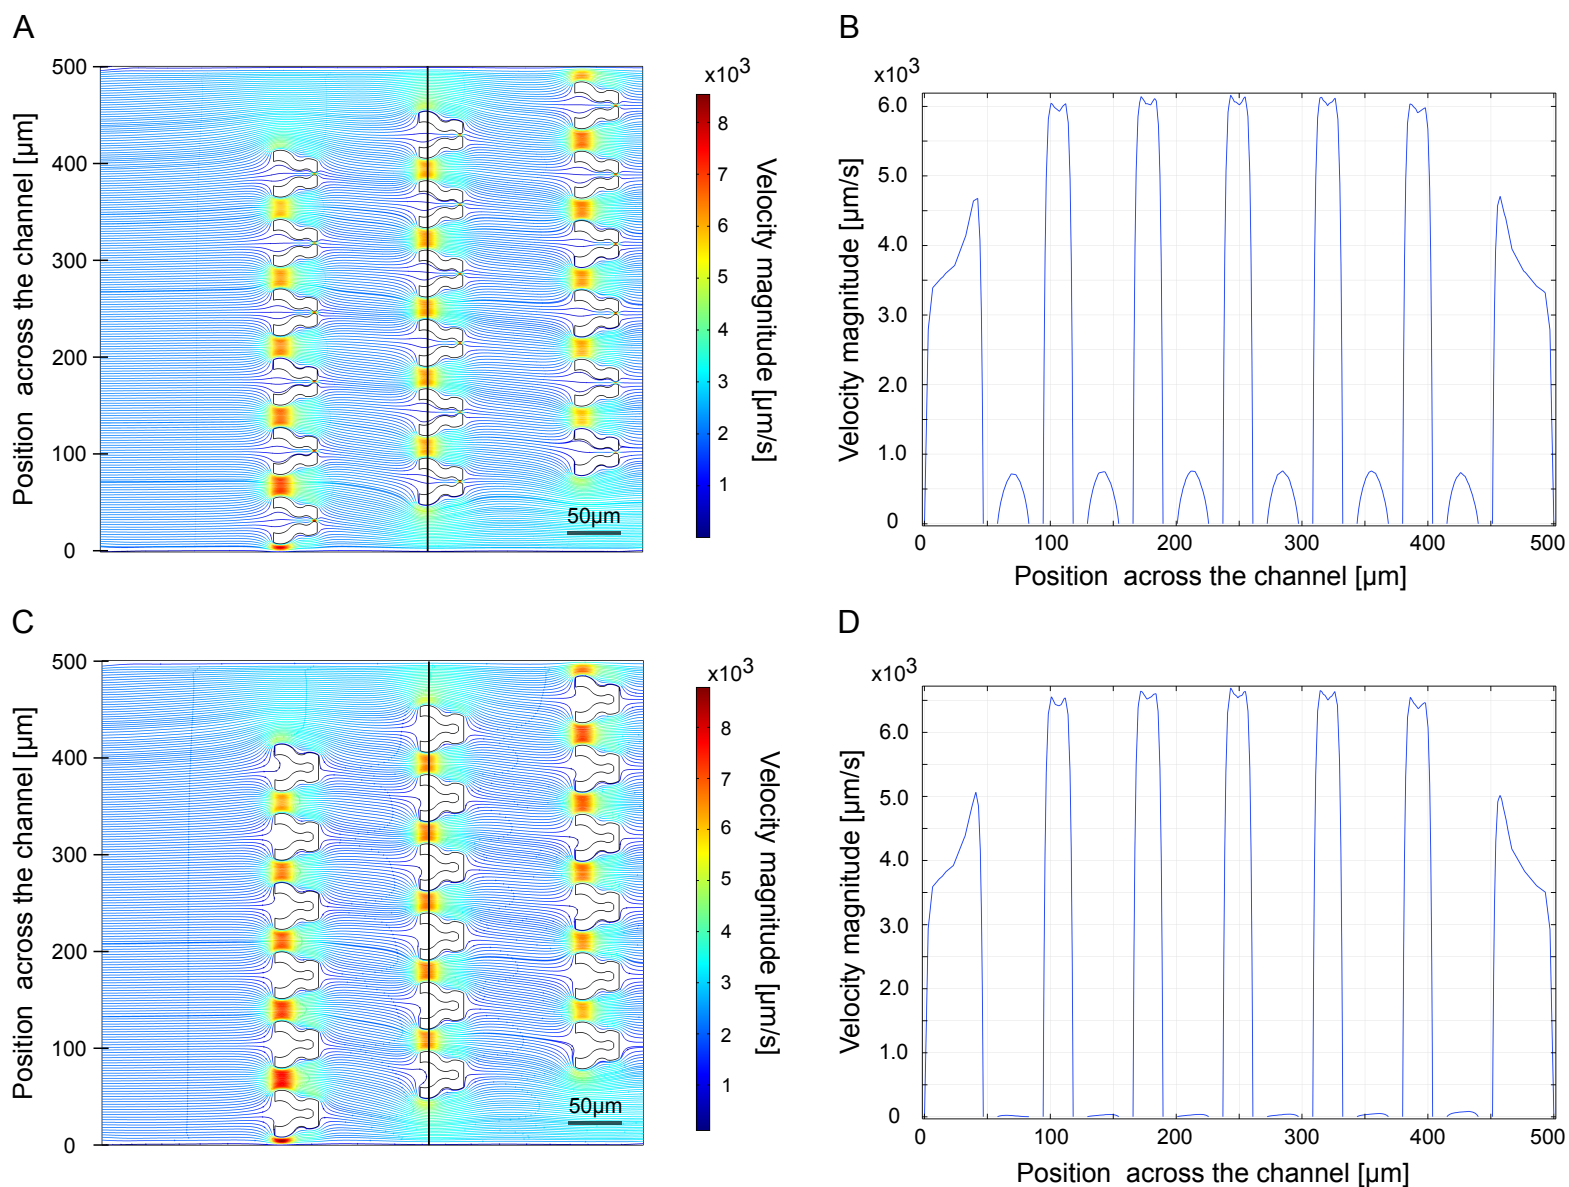

**Supplementary Figure S1.** Calculated flow field in the “Tulip” microfluidic device. The density of the streamlines and the color code represents the velocity magnitude. A-B) streamlines with empty traps (without trapped cells) and the corresponding velocity magnitude profile across the channel along the line. C-D) streamlines with closed traps (simulating traps occupied by cells) and the corresponding velocity magnitude profile across the channel along the line.
